# Supplementary material for: The interactome of metabolic enzyme carbonic anhydrase IX reveals novel roles in tumor cell migration and invadopodia/MMP14-mediated invasion
Source: PubMed Central journal article supplement (PMC5684442; doi:10.1038/onc.2017.219), 2017-07-10
Supplement: onc2017219x1.pdf [file onc2017219x1.pdf]

## Supplemental Table

**Table S1: BioID Mass spectrometry analysis.** BioID results for: twenty control mass spectrometry (MS) runs (only the two spectral counts for each protein ID are displayed, see Method section for details), and two biological replicates of CAIX-BirA\*Flag overexpressing MDA-MB-231 cells cultured in normoxia (in black text) and in hypoxia (in blue text). Data are presented as spectral counts detected for each prey protein, as indicated. High confidence proximal interactors were determined with the SAINT algorithm, and filtered with the following parameters: iProphet confidence score  $p \geq 0.9$ , BFDR  $< 0.02$ . Bait peptide counts (for BirA\* and CAIX proteins) are highlighted in yellow (NA: Not Applicable).

| Gene ID | Protein ID | Gene Name      | Full name                                                                                        | Top 2 controls |       | CA9 BioID normoxia |        |       | CA9 BioID hypoxia |        |       |
|---------|------------|----------------|--------------------------------------------------------------------------------------------------|----------------|-------|--------------------|--------|-------|-------------------|--------|-------|
|         |            |                |                                                                                                  |                |       | pool A             | pool B | SAINT | pool A            | pool B | SAINT |
| 948469  | 16131807   | <b>birA</b>    | <i>biotin ligase (E.Coli)</i>                                                                    | 12451          | 11921 | 4760               | 2317   | NA    | 4831              | 2565   | NA    |
| 768     | 169636420  | <b>CA9</b>     | <i>carbonic anhydrase 9</i>                                                                      |                |       | 1048               | 661    | NA    | 1062              | 620    | NA    |
| 7112    | 73760405   | <b>TMPO</b>    | <i>thymopoietin</i>                                                                              | 108            | 108   | 1363               | 482    | 1.00  | 1290              | 397    | 1.00  |
| 6184    | 4506675    | <b>RPN1</b>    | <i>ribophorin I</i>                                                                              | 71             | 65    | 301                | 291    | 1.00  | 313               | 257    | 1.00  |
| 10424   | 291621647  | <b>PGRMC2</b>  | <i>progesterone receptor membrane component 2</i>                                                | 41             | 37    | 250                | 253    | 1.00  | 262               | 235    | 1.00  |
| 10970   | 19920317   | <b>CKAP4</b>   | <i>cytoskeleton-associated protein 4</i>                                                         | 54             | 51    | 208                | 189    | 1.00  | 228               | 194    | 1.00  |
| 201595  | 30578410   | <b>STT3B</b>   | <i>STT3B, catalytic subunit of the oligosaccharyltransferase complex</i>                         | 8              | 6     | 135                | 114    | 1.00  | 124               | 106    | 1.00  |
| 6520    | 61744483   | <b>SLC3A2</b>  | <i>solute carrier family 3 member 2</i>                                                          | 37             | 35    | 116                | 115    | 1.00  | 110               | 73     |       |
| 7444    | 194440707  | <b>VRK2</b>    | <i>vaccinia related kinase 2</i>                                                                 | 7              | 7     | 108                | 95     | 1.00  | 118               | 114    | 1.00  |
| 3163    | 187761307  | <b>HMOX2</b>   | <i>heme oxygenase 2</i>                                                                          | 5              | 5     | 111                | 86     | 1.00  | 122               | 93     | 1.00  |
| 7466    | 224994203  | <b>WFS1</b>    | <i>wolframin ER transmembrane glycoprotein protein tyrosine phosphatase, non-receptor type 1</i> | 6              | 3     | 108                | 85     | 1.00  | 124               | 74     | 1.00  |
| 5770    | 4506289    | <b>PTPN1</b>   | <i>protein tyrosine phosphatase, non-receptor type 1</i>                                         | 25             | 23    | 107                | 84     | 1.00  | 95                | 69     | 1.00  |
| 6646    | 49533617   | <b>SOAT1</b>   | <i>sterol O-acyltransferase 1</i>                                                                | 6              |       | 111                | 80     | 1.00  | 108               | 57     | 1.00  |
| 3998    | 5031873    | <b>LMAN1</b>   | <i>lectin, mannose binding 1</i>                                                                 | 4              | 3     | 103                | 65     | 1.00  | 96                | 62     | 1.00  |
| 6734    | 23308697   | <b>SRPR</b>    | <i>SRP receptor alpha subunit</i>                                                                | 13             | 12    | 100                | 53     | 1.00  | 102               | 45     | 1.00  |
| 55129   | 94536803   | <b>ANO10</b>   | <i>anoctamin 10</i>                                                                              | 4              |       | 82                 | 60     | 1.00  | 88                | 55     | 1.00  |
| 84803   | 21362092   | <b>AGPAT9</b>  | <i>lysophosphatidylcholine acyltransferase 1</i>                                                 | 11             | 8     | 77                 | 52     | 1.00  | 72                | 46     | 1.00  |
| 6786    | 21070997   | <b>STIM1</b>   | <i>stromal interaction molecule 1</i>                                                            | 12             | 9     | 67                 | 60     | 1.00  | 76                | 48     | 1.00  |
| 10550   | 5453704    | <b>ARL6IP5</b> | <i>ADP ribosylation factor like GTPase 6 interacting protein 5</i>                               | 3              | 2     | 65                 | 59     | 1.00  | 67                | 60     | 1.00  |
| 55591   | 155030244  | <b>VEZT</b>    | <i>vezatin, adherens junctions transmembrane protein</i>                                         | 3              | 2     | 68                 | 55     | 1.00  | 76                | 42     | 1.00  |

|        |           |                 |                                                                            |    |    |    |    |      |    |    |      |
|--------|-----------|-----------------|----------------------------------------------------------------------------|----|----|----|----|------|----|----|------|
| 81502  | 23308607  | <b>HM13</b>     | <i>histocompatibility (minor) 13</i>                                       | 6  | 4  | 57 | 62 | 1.00 | 47 | 48 | 1.00 |
| 84061  | 215983058 | <b>MAGT1</b>    | <i>magnesium transporter 1</i>                                             |    |    | 55 | 63 | 1.00 | 55 | 58 | 1.00 |
| 54407  | 21361602  | <b>SLC38A2</b>  | <i>solute carrier family 38 member 2</i>                                   | 12 | 12 | 56 | 61 | 1.00 | 57 | 62 | 1.00 |
| 23592  | 7706607   | <b>LEMD3</b>    | <i>LEM domain containing 3</i>                                             | 16 | 16 | 51 | 64 | 1.00 | 51 | 49 | 1.00 |
| 9694   | 7661910   | <b>TTC35</b>    | <i>ER membrane protein complex subunit 2</i>                               | 9  | 7  | 62 | 50 | 1.00 | 60 | 33 | 1.00 |
| 3688   | 19743813  | <b>ITGB1</b>    | <i>integrin subunit beta 1</i>                                             | 11 | 9  | 66 | 45 | 1.00 | 72 | 38 | 1.00 |
| 57003  | 171906582 | <b>CCDC47</b>   | <i>coiled-coil domain containing 47</i>                                    | 9  | 8  | 61 | 46 | 1.00 | 62 | 40 | 1.00 |
| 3655   | 119395740 | <b>ITGA6</b>    | <i>integrin subunit alpha 6</i>                                            | 7  | 5  | 54 | 48 | 1.00 | 56 | 40 | 1.00 |
| 81839  | 20373171  | <b>VANGL1</b>   | <i>VANGL planar cell polarity protein 1</i>                                | 5  | 4  | 61 | 41 | 1.00 | 64 | 40 | 1.00 |
| 3673   | 116295258 | <b>ITGA2</b>    | <i>integrin subunit alpha 2</i>                                            |    |    | 51 | 47 | 1.00 | 43 | 36 | 1.00 |
| 81542  | 151101292 | <b>TMX1</b>     | <i>thioredoxin related transmembrane protein 1</i>                         | 5  | 3  | 57 | 41 | 1.00 | 56 | 30 | 1.00 |
| 55706  | 271398350 | <b>TMEM48</b>   | <i>NDC1 transmembrane nucleoporin dehydrogenase/reductase (SDR family)</i> | 8  | 8  | 57 | 36 | 1.00 | 54 | 27 | 1.00 |
| 51635  | 7706318   | <b>DHRS7</b>    | <i>member 7</i>                                                            |    |    | 56 | 36 | 1.00 | 53 | 33 | 1.00 |
| 493856 | 56605994  | <b>CISD2</b>    | <i>CDGSH iron sulfur domain 2</i>                                          | 13 | 13 | 45 | 38 | 1.00 | 45 | 29 |      |
| 26092  | 389886539 | <b>TOR1AIP1</b> | <i>torsin 1A interacting protein 1</i>                                     | 7  | 7  | 51 | 32 | 1.00 | 62 | 25 | 1.00 |
| 9497   | 385648268 | <b>SLC4A7</b>   | <i>solute carrier family 4 member 7</i>                                    | 5  | 4  | 52 | 28 | 1.00 | 32 | 24 | 1.00 |
| 23065  | 22095331  | <b>KIAA0090</b> | <i>ER membrane protein complex subunit 1</i>                               | 7  | 7  | 53 | 25 | 1.00 | 56 | 24 | 1.00 |
| 147007 | 22748979  | <b>TMEM199</b>  | <i>transmembrane protein 199</i>                                           |    |    | 42 | 32 | 1.00 | 36 | 48 | 1.00 |
| 64215  | 21361912  | <b>DNAJC1</b>   | <i>DnaJ heat shock protein family (Hsp40) member C1</i>                    |    |    | 44 | 28 | 1.00 | 40 | 26 | 1.00 |
| 3675   | 4504747   | <b>ITGA3</b>    | <i>integrin subunit alpha 3</i>                                            | 4  |    | 46 | 24 | 1.00 | 47 | 29 | 1.00 |
| 163590 | 21450775  | <b>TOR1AIP2</b> | <i>torsin 1A interacting protein 2</i>                                     | 9  | 9  | 39 | 31 | 1.00 | 48 | 26 | 0.96 |
| 5771   | 333108231 | <b>PTPN2</b>    | <i>protein tyrosine phosphatase, non-receptor type 2</i>                   | 8  | 8  | 34 | 34 | 1.00 | 31 | 27 | 1.00 |
| 537    | 17136148  | <b>ATP6AP1</b>  | <i>ATPase H+ transporting accessory protein 1</i>                          |    |    | 43 | 23 | 1.00 | 42 | 29 | 1.00 |
| 4162   | 71274107  | <b>MCAM</b>     | <i>melanoma cell adhesion molecule</i>                                     | 4  | 3  | 48 | 17 | 1.00 | 46 | 18 | 1.00 |
| 23190  | 24307965  | <b>UBXN4</b>    | <i>UBX domain protein 4</i>                                                | 8  | 5  | 37 | 27 | 1.00 | 45 | 31 | 1.00 |
| 23478  | 7657609   | <b>SEC11A</b>   | <i>SEC11 homolog A, signal peptidase complex subunit</i>                   | 5  | 5  | 37 | 24 | 1.00 | 35 | 20 | 1.00 |
| 9789   | 162417971 | <b>SPCS2</b>    | <i>signal peptidase complex subunit 2</i>                                  | 2  |    | 32 | 28 | 1.00 | 28 | 22 | 1.00 |
| 23353  | 195972890 | <b>SUN1</b>     | <i>Sad1 and UNC84 domain containing 1</i>                                  |    |    | 30 | 30 | 1.00 | 32 | 29 | 1.00 |
| 9451   | 134304838 | <b>EIF2AK3</b>  | <i>eukaryotic translation initiation factor 2 alpha kinase 3</i>           |    |    | 32 | 23 | 1.00 | 30 | 32 | 1.00 |

|        |           |                 |                                                                                  |   |   |    |    |      |    |    |      |
|--------|-----------|-----------------|----------------------------------------------------------------------------------|---|---|----|----|------|----|----|------|
| 203547 | 63025214  | <b>VMA21</b>    | <i>VMA21 vacuolar H<sup>+</sup>-ATPase homolog (S. cerevisiae)</i>               |   |   | 32 | 21 | 1.00 | 30 |    |      |
| 23155  | 115270970 | <b>CLCC1</b>    | <i>chloride channel CLIC like 1</i>                                              | 4 | 4 | 34 | 16 | 1.00 | 32 | 22 | 1.00 |
| 3107   | 339882741 | <b>HLA-C</b>    | <i>major histocompatibility complex, class I, C</i>                              | 5 | 3 | 22 | 28 | 1.00 | 23 | 26 | 1.00 |
| 60559  | 11345462  | <b>SPCS3</b>    | <i>signal peptidase complex subunit 3</i>                                        | 6 | 5 | 23 | 27 | 1.00 | 24 | 26 | 1.00 |
| 4323   | 4826834   | <b>MMP14</b>    | <i>matrix metalloproteinase 14</i>                                               | 5 | 3 | 18 | 31 | 1.00 | 15 | 24 | 0.99 |
| 65983  | 226443007 | <b>GRAMD3</b>   | <i>GRAM domain containing 3</i>                                                  | 3 | 3 | 22 | 26 | 1.00 | 21 | 18 | 1.00 |
| 550    | 31712030  | <b>AUP1</b>     | <i>ancient ubiquitous protein 1</i>                                              | 2 |   | 25 | 22 | 1.00 | 21 | 19 | 1.00 |
| 29956  | 31077094  | <b>CERS2</b>    | <i>ceramide synthase 2</i>                                                       | 3 | 2 | 24 | 23 | 1.00 | 25 | 15 | 1.00 |
| 6745   | 169404009 | <b>SSR1</b>     | <i>signal sequence receptor, alpha</i>                                           | 6 | 2 | 23 | 21 | 1.00 | 21 | 25 | 1.00 |
| 3482   | 119964726 | <b>IGF2R</b>    | <i>insulin like growth factor 2 receptor</i>                                     | 5 | 5 | 18 | 25 | 1.00 | 21 | 19 | 1.00 |
| 25923  | 45827806  | <b>ATL3</b>     | <i>atlastin GTPase 3</i>                                                         | 3 |   | 24 | 18 | 1.00 | 16 | 15 | 0.99 |
| 10159  | 15011918  | <b>ATP6AP2</b>  | <i>ATPase H<sup>+</sup> transporting accessory protein 2</i>                     |   |   | 28 | 14 | 1.00 | 25 | 16 | 1.00 |
| 9296   | 20357547  | <b>ATP6V1F</b>  | <i>ATPase H<sup>+</sup> transporting V1 subunit F</i>                            | 2 |   | 25 | 17 | 1.00 | 25 | 27 | 1.00 |
| 128869 | 17998700  | <b>PIGU</b>     | <i>phosphatidylinositol glycan anchor biosynthesis class U</i>                   | 4 | 3 | 24 | 18 | 1.00 | 28 | 15 | 1.00 |
| 10999  | 40807357  | <b>SLC27A4</b>  | <i>solute carrier family 27 member 4</i>                                         | 6 | 5 | 18 | 23 | 0.99 | 20 | 14 |      |
| 51368  | 193788629 | <b>TEX264</b>   | <i>testis expressed 264</i>                                                      | 2 |   | 21 | 18 | 1.00 | 25 | 15 | 1.00 |
| 752    | 33356148  | <b>FMNL1</b>    | <i>formin like 1</i>                                                             | 7 | 4 | 22 | 17 | 0.96 | 13 | 13 |      |
| 51170  | 142976729 | <b>HSD17B11</b> | <i>hydroxysteroid (17-beta) dehydrogenase 11</i>                                 |   |   | 13 | 24 | 1.00 | 11 | 9  | 1.00 |
| 64755  | 257900512 | <b>C16orf58</b> | <i>chromosome 16 open reading frame 58</i>                                       |   |   | 19 | 17 | 1.00 | 26 | 22 | 1.00 |
| 57326  | 19923830  | <b>PBXIP1</b>   | <i>pre-B-cell leukemia homeobox interacting protein 1</i>                        |   |   | 15 | 21 | 1.00 | 19 | 14 | 1.00 |
| 196527 | 218156299 | <b>ANO6</b>     | <i>anoctamin 6</i>                                                               |   |   | 21 | 14 | 1.00 | 23 | 13 | 1.00 |
| 3949   | 307775412 | <b>LDLR</b>     | <i>low density lipoprotein receptor</i>                                          |   |   | 12 | 22 | 1.00 | 10 | 24 | 0.95 |
| 9645   | 7662284   | <b>MICAL2</b>   | <i>microtubule associated monoxygenase, calponin and LIM domain containing 2</i> | 2 |   | 20 | 12 | 1.00 | 15 | 15 | 1.00 |
| 57181  | 187936949 | <b>SLC39A10</b> | <i>solute carrier family 39 member 10</i>                                        |   |   | 15 | 17 | 1.00 | 14 | 19 | 1.00 |
| 25777  | 313760643 | <b>SUN2</b>     | <i>Sad1 and UNC84 domain containing 2</i>                                        |   |   | 16 | 16 | 1.00 | 26 | 30 | 1.00 |
| 9854   | 42716277  | <b>C2CD2L</b>   | <i>C2CD2 like</i>                                                                |   |   | 25 | 6  | 1.00 | 23 | 11 | 1.00 |
| 57620  | 281182822 | <b>STIM2</b>    | <i>stromal interaction molecule 2</i>                                            | 4 | 3 | 15 | 16 | 1.00 | 17 | 14 | 1.00 |
| 1047   | 194578888 | <b>CLGN</b>     | <i>calmegin</i>                                                                  | 4 |   | 18 | 13 | 0.93 | 21 | 14 | 0.96 |
| 9791   | 7662647   | <b>PTDSS1</b>   | <i>phosphatidylserine synthase 1</i>                                             | 2 | 2 | 21 | 9  | 0.98 | 25 | 21 | 1.00 |

|        |           |                 |                                                                                                  |   |   |    |    |      |    |    |      |
|--------|-----------|-----------------|--------------------------------------------------------------------------------------------------|---|---|----|----|------|----|----|------|
| 202018 | 130977756 | <b>TAPT1</b>    | <i>transmembrane anterior posterior transformation 1</i>                                         |   |   | 16 | 13 | 1.00 | 13 | 8  | 1.00 |
| 55219  | 31542661  | <b>TMEM57</b>   | <i>transmembrane protein 57</i>                                                                  | 3 | 2 | 18 | 11 | 0.99 | 13 | 19 | 1.00 |
| 121457 | 24233517  | <b>IKBIP</b>    | <i>IKBKB interacting protein</i>                                                                 |   |   | 13 | 13 | 1.00 | 13 | 8  | 1.00 |
| 24145  | 39995064  | <b>PANX1</b>    | <i>pannexin 1</i>                                                                                |   |   | 18 | 8  | 1.00 | 20 | 20 | 1.00 |
| 10493  | 18379349  | <b>VAT1</b>     | <i>vesicle amine transport 1</i>                                                                 | 2 |   | 17 | 9  | 0.98 | 13 | 12 | 1.00 |
| 26090  | 109689718 | <b>ABHD12</b>   | <i>abhydrolase domain containing 12</i>                                                          |   |   | 14 | 10 | 1.00 | 17 | 9  | 1.00 |
| 23341  | 56687498  | <b>DNAJC16</b>  | <i>DnaJ heat shock protein family (Hsp40) member C16</i>                                         |   |   | 15 | 9  | 1.00 | 16 | 13 | 1.00 |
| 351    | 209862833 | <b>APP</b>      | <i>amyloid beta precursor protein</i>                                                            |   |   | 10 | 13 | 1.00 | 13 | 12 | 1.00 |
| 23545  | 42741679  | <b>ATP6VOA2</b> | <i>ATPase H+ transporting V0 subunit a2</i>                                                      |   |   | 10 | 13 | 1.00 | 9  | 13 | 1.00 |
| 9415   | 4758334   | <b>FADS2</b>    | <i>fatty acid desaturase 2</i>                                                                   |   |   | 8  | 15 | 1.00 | 6  | 9  | 1.00 |
| 9197   | 300360496 | <b>SLC33A1</b>  | <i>solute carrier family 33 member 1</i>                                                         | 3 | 2 | 13 | 10 | 0.98 | 14 | 10 | 0.98 |
| 5447   | 127139033 | <b>POR</b>      | <i>cytochrome p450 oxidoreductase</i>                                                            |   |   | 16 | 6  | 1.00 | 16 | 5  | 1.00 |
| 81671  | 20070349  | <b>VMP1</b>     | <i>vacuole membrane protein 1</i>                                                                |   |   | 12 | 10 | 1.00 | 14 | 10 | 1.00 |
| 28972  | 193290128 | <b>SPCS1</b>    | <i>signal peptidase complex subunit 1</i>                                                        |   |   | 12 | 9  | 1.00 | 11 | 8  | 1.00 |
| 137964 | 30520329  | <b>AGPAT6</b>   | <i>glycerol-3-phosphate acyltransferase 4</i>                                                    |   |   | 10 | 10 | 1.00 | 14 | 16 | 1.00 |
| 811    | 4757900   | <b>CALR</b>     | <i>calreticulin transporter 1, ATP-binding cassette, sub-family B (MDR/TAP)</i>                  |   |   | 6  | 14 | 1.00 | 3  | 8  | 0.99 |
| 6890   | 9665248   | <b>TAP1</b>     | <i>B (MDR/TAP)</i>                                                                               |   |   | 9  | 11 | 1.00 | 14 | 12 | 1.00 |
| 6526   | 110835708 | <b>SLC5A3</b>   | <i>solute carrier family 5 member 3</i>                                                          |   |   | 8  | 11 | 1.00 | 10 | 6  | 1.00 |
| 7078   | 4507513   | <b>TIMP3</b>    | <i>TIMP metallopeptidase inhibitor 3</i>                                                         |   |   | 9  | 9  | 1.00 | 6  |    |      |
| 8677   | 4507285   | <b>STX10</b>    | <i>syntaxin 10</i>                                                                               |   |   | 8  | 9  | 1.00 | 10 |    |      |
| 55151  | 8922461   | <b>TMEM38B</b>  | <i>transmembrane protein 38B</i>                                                                 |   |   | 13 | 4  | 1.00 | 9  | 4  | 1.00 |
| 118429 | 224809466 | <b>ANTXR2</b>   | <i>anthrax toxin receptor 2</i>                                                                  |   |   | 14 | 3  | 0.99 | 11 | 8  | 1.00 |
| 54587  | 14150145  | <b>MXRA8</b>    | <i>matrix-remodelling associated 8</i>                                                           |   |   | 15 | 2  | 0.97 | 21 |    |      |
| 22908  | 190014578 | <b>SACM1L</b>   | <i>SAC1 suppressor of actin mutations 1-like (yeast)</i>                                         | 2 |   | 8  | 9  | 0.96 | 3  |    |      |
| 3106   | 17986001  | <b>HLA-B</b>    | <i>major histocompatibility complex, class I, B spectrin repeat containing, nuclear envelope</i> | 2 | 2 | 8  | 9  | 0.93 | 8  | 9  | 0.93 |
| 161176 | 145580592 | <b>C14orf49</b> | <i>family member 3</i>                                                                           |   |   | 7  | 9  | 1.00 | 4  | 14 | 1.00 |
| 7991   | 30410790  | <b>TUSC3</b>    | <i>tumor suppressor candidate 3</i>                                                              |   |   | 5  | 11 | 1.00 |    |    |      |
| 25966  | 119226222 | <b>C2CD2</b>    | <i>C2 calcium-dependent domain containing 2</i>                                                  | 2 |   | 8  | 8  | 0.94 | 3  |    |      |
| 79188  | 13236587  | <b>TMEM43</b>   | <i>transmembrane protein 43</i>                                                                  | 2 |   | 8  | 8  | 0.94 | 10 | 12 | 0.99 |

|        |           |                 |                                                                         |    |    |      |    |    |      |
|--------|-----------|-----------------|-------------------------------------------------------------------------|----|----|------|----|----|------|
| 481    | 4502277   | <b>ATP1B1</b>   | <i>ATPase Na<sup>+</sup>/K<sup>+</sup> transporting subunit beta 1</i>  | 8  | 7  | 1.00 | 9  | 8  | 1.00 |
| 11118  | 308736964 | <b>BTN3A2</b>   | <i>butyrophilin subfamily 3 member A2</i>                               | 5  | 10 | 1.00 | 5  | 7  | 1.00 |
| 3678   | 56237029  | <b>ITGA5</b>    | <i>integrin subunit alpha 5</i>                                         | 9  | 6  | 1.00 | 12 |    |      |
| 80856  | 38176151  | <b>KIAA1715</b> | <i>KIAA1715</i>                                                         | 10 | 5  | 1.00 | 13 | 6  | 1.00 |
| 2030   | 118582260 | <b>SLC29A1</b>  | <i>solute carrier family 29 member 1 (Augustine blood group)</i>        | 11 | 4  | 1.00 | 12 | 7  | 1.00 |
| 8829   | 182508169 | <b>NRP1</b>     | <i>neuropilin 1</i>                                                     | 3  | 12 | 0.99 |    | 3  |      |
| 1509   | 4503143   | <b>CTSD</b>     | <i>cathepsin D</i>                                                      | 3  | 11 | 0.99 | 2  |    |      |
| 54822  | 148612863 | <b>TRPM7</b>    | <i>transient receptor potential cation channel subfamily M member 7</i> | 8  | 5  | 1.00 | 4  | 8  | 1.00 |
| 55850  | 8923936   | <b>USE1</b>     | <i>unconventional SNARE in the ER 1</i>                                 | 9  | 4  | 1.00 | 8  | 9  | 1.00 |
| 129642 | 40548387  | <b>MBOAT2</b>   | <i>membrane bound O-acyltransferase domain containing 2</i>             | 7  | 5  | 1.00 | 8  |    |      |
| 768211 | 146094506 | <b>RELL1</b>    | <i>RELT like 1</i>                                                      | 4  | 8  | 1.00 | 7  | 7  | 1.00 |
| 148867 | 222080086 | <b>SLC30A7</b>  | <i>solute carrier family 30 member 7</i>                                | 7  | 5  | 1.00 | 8  |    |      |
| 10094  | 5031597   | <b>ARPC3</b>    | <i>actin related protein 2/3 complex subunit 3</i>                      | 2  | 10 | 0.97 |    | 7  |      |
| 64866  | 30410805  | <b>CDCP1</b>    | <i>CUB domain containing protein 1</i>                                  | 6  | 5  | 1.00 | 4  | 12 | 1.00 |
| 5873   | 19923264  | <b>RAB27A</b>   | <i>RAB27A, member RAS oncogene family</i>                               | 5  | 6  | 1.00 | 6  | 5  | 1.00 |
| 23516  | 190358541 | <b>SLC39A14</b> | <i>solute carrier family 39 member 14</i>                               | 6  | 5  | 1.00 | 8  | 7  | 1.00 |
| 10653  | 10863909  | <b>SPINT2</b>   | <i>serine peptidase inhibitor, Kunitz type, 2</i>                       | 6  | 5  | 1.00 | 11 | 7  | 1.00 |
| 214    | 343168770 | <b>ALCAM</b>    | <i>activated leukocyte cell adhesion molecule</i>                       | 8  | 3  | 0.99 | 3  | 5  | 0.99 |
| 84141  | 14149865  | <b>FAM176A</b>  | <i>eva-1 homolog A, regulator of programmed cell death</i>              | 5  | 5  | 1.00 |    | 3  |      |
| 94005  | 15088795  | <b>PIGS</b>     | <i>phosphatidylinositol glycan anchor biosynthesis class S</i>          | 7  | 3  | 0.99 | 9  | 7  | 1.00 |
| 7355   | 109948265 | <b>SLC35A2</b>  | <i>solute carrier family 35 member A2</i>                               | 7  | 3  | 0.99 | 5  | 4  | 1.00 |
| 54867  | 134152683 | <b>TMEM214</b>  | <i>transmembrane protein 214</i>                                        | 7  | 3  | 0.99 | 4  | 4  | 1.00 |
| 116068 | 84370276  | <b>LYSMD3</b>   | <i>LysM domain containing 3</i>                                         | 5  | 4  | 1.00 | 4  |    |      |
| 334    | 214010181 | <b>APLP2</b>    | <i>amyloid beta precursor like protein 2</i>                            | 4  | 4  | 1.00 | 4  | 7  | 1.00 |
| 6574   | 31543630  | <b>SLC20A1</b>  | <i>solute carrier family 20 member 1</i>                                | 3  | 5  | 0.99 | 4  |    |      |
| 79796  | 118026921 | <b>ALG9</b>     | <i>ALG9, alpha-1,2-mannosyltransferase</i>                              | 6  | 2  | 0.97 | 8  |    |      |
| 8879   | 31982936  | <b>SGPL1</b>    | <i>sphingosine-1-phosphate lyase 1</i>                                  | 2  | 6  | 0.97 | 4  | 6  | 1.00 |
| 252839 | 7705999   | <b>TMEM9</b>    | <i>transmembrane protein 9</i>                                          | 2  | 6  | 0.97 | 3  |    |      |
| 9321   | 190194412 | <b>TRIP11</b>   | <i>thyroid hormone receptor interactor 11</i>                           | 2  | 6  | 0.97 |    | 2  |      |
| 199953 | 262399371 | <b>TMEM201</b>  | <i>transmembrane protein 201</i>                                        | 3  | 4  | 0.99 |    |    |      |

|        |           |                |                                                               |    |    |  |    |    |      |     |    |      |
|--------|-----------|----------------|---------------------------------------------------------------|----|----|--|----|----|------|-----|----|------|
| 23230  | 15619008  | <b>VPS13A</b>  | <i>vacuolar protein sorting 13 homolog A</i>                  |    |    |  | 2  | 2  | 0.93 | 5   |    |      |
| 347902 | 219521831 | <b>AMIGO2</b>  | <i>adhesion molecule with Ig-like domain 2</i>                |    |    |  |    |    |      | 4   | 4  | 1.00 |
| 382    | 4502211   | <b>ARF6</b>    | <i>ADP ribosylation factor 6</i>                              | 7  | 7  |  | 38 | 19 |      | 33  | 23 | 1.00 |
| 51272  | 149192862 | <b>BET1L</b>   | <i>Bet1 golgi vesicular membrane trafficking protein like</i> |    |    |  |    | 6  |      | 8   | 8  | 1.00 |
| 10384  | 261490684 | <b>BTN3A3</b>  | <i>butyrophilin subfamily 3 member A3</i>                     |    |    |  |    |    |      | 4   | 7  | 1.00 |
| 56262  | 187829871 | <b>LRRC8A</b>  | <i>leucine rich repeat containing 8 family member A</i>       |    |    |  | 3  |    |      | 5   | 6  | 1.00 |
| 93380  | 27735037  | <b>MMGT1</b>   | <i>membrane magnesium transporter 1</i>                       |    |    |  |    |    |      | 11  | 6  | 1.00 |
| 51594  | 41393547  | <b>NBAS</b>    | <i>neuroblastoma amplified sequence</i>                       |    |    |  |    |    |      | 4   | 4  | 1.00 |
| 8613   | 29171740  | <b>PPAP2B</b>  | <i>phospholipid phosphatase 3</i>                             |    |    |  | 9  |    |      | 9   | 7  | 1.00 |
| 5874   | 5729997   | <b>RAB27B</b>  | <i>RAB27B, member RAS oncogene family</i>                     |    |    |  | 7  |    |      | 12  | 7  | 1.00 |
| 285282 | 62751417  | <b>RABL3</b>   | <i>RAB, member of RAS oncogene family like 3</i>              | 5  | 5  |  | 27 | 7  |      | 22  | 28 | 1.00 |
| 81539  | 117168275 | <b>SLC38A1</b> | <i>solute carrier family 38 member 1</i>                      |    |    |  |    | 4  |      | 5   | 5  | 1.00 |
| 55627  | 102467481 | <b>SMPD4</b>   | <i>sphingomyelin phosphodiesterase 4</i>                      | 3  | 2  |  | 6  | 13 |      | 26  | 18 | 1.00 |
| 81848  | 188595697 | <b>SPRY4</b>   | <i>sprouty RTK signaling antagonist 4</i>                     | 5  | 4  |  | 32 | 8  |      | 37  | 23 | 1.00 |
| 55240  | 56549145  | <b>STEAP3</b>  | <i>STEAP3 metalloredutase</i>                                 | 9  | 7  |  | 37 | 11 |      | 50  | 35 | 1.00 |
| 23670  | 209447096 | <b>TMEM2</b>   | <i>transmembrane protein 2</i>                                | 3  | 2  |  | 11 | 9  |      | 16  | 13 | 1.00 |
| 9528   | 20070191  | <b>TMEM59</b>  | <i>transmembrane protein 59</i>                               |    |    |  | 4  |    |      | 7   | 6  | 1.00 |
| 101    | 256773264 | <b>ADAM8</b>   | <i>ADAM metallopeptidase domain 8</i>                         |    |    |  |    |    |      | 3   | 6  | 0.99 |
| 116254 | 20302038  | <b>C6orf72</b> | <i>glycoprotein integral membrane 1</i>                       |    |    |  |    | 3  |      | 4   | 3  | 0.99 |
| 54901  | 93277076  | <b>CDKAL1</b>  | <i>CDK5 regulatory subunit associated protein 1 like 1</i>    | 17 | 15 |  | 55 | 34 |      | 56  | 45 | 0.99 |
| 11261  | 6005731   | <b>CHP</b>     | <i>calcineurin like EF-hand protein 1</i>                     |    |    |  | 4  |    |      | 3   | 5  | 0.99 |
| 1605   | 294997282 | <b>DAG1</b>    | <i>dystroglycan 1</i>                                         |    |    |  | 13 |    |      | 13  | 3  | 0.99 |
| 115817 | 19923983  | <b>DHRS1</b>   | <i>dehydrogenase/reductase 1</i>                              |    |    |  |    |    |      | 3   | 5  | 0.99 |
| 2010   | 4557553   | <b>EMD</b>     | <i>emerin</i>                                                 | 22 | 21 |  | 87 | 52 |      | 100 | 59 | 0.99 |
| 91289  | 255918129 | <b>LMF2</b>    | <i>lipase maturation factor 2</i>                             | 7  | 5  |  | 17 | 10 |      | 21  | 20 | 0.99 |
| 54884  | 203098013 | <b>RETSAT</b>  | <i>retinol saturase</i>                                       |    |    |  | 3  |    |      | 3   | 4  | 0.99 |
| 9517   | 4758668   | <b>SPTLC2</b>  | <i>serine palmitoyltransferase long chain base subunit 2</i>  |    |    |  | 6  |    |      | 4   | 3  | 0.99 |
| 1186   | 14149607  | <b>CLCN7</b>   | <i>chloride voltage-gated channel 7</i>                       | 10 | 9  |  | 40 | 15 |      | 42  | 28 | 0.98 |
| 9445   | 11527402  | <b>ITM2B</b>   | <i>integral membrane protein 2B</i>                           | 3  |    |  | 25 | 9  |      | 25  | 12 | 0.98 |
| 129401 | 31982904  | <b>NUP35</b>   | <i>nucleoporin 35</i>                                         |    |    |  | 2  |    |      | 2   | 6  | 0.97 |
| 5327   | 14702169  | <b>PLAT</b>    | <i>plasminogen activator, tissue type</i>                     |    |    |  |    |    |      | 2   | 4  | 0.97 |

|       |           |                |                                                              |    |   |     |    |     |    |      |
|-------|-----------|----------------|--------------------------------------------------------------|----|---|-----|----|-----|----|------|
| 10066 | 5730031   | <b>SCAMP2</b>  | <i>secretory carrier membrane protein 2</i>                  |    |   | 6   |    | 2   | 6  | 0.97 |
| 79939 | 164607128 | <b>SLC35E1</b> | <i>solute carrier family 35 member E1</i>                    | 3  | 2 | 11  | 5  | 10  | 11 | 0.97 |
| 9166  | 37694065  | <b>EBAG9</b>   | <i>estrogen receptor binding site associated, antigen, 9</i> |    |   |     |    | 2   | 3  | 0.96 |
| 51075 | 221136993 | <b>TMX2</b>    | <i>thioredoxin related transmembrane protein 2</i>           |    |   | 2   |    | 3   | 2  | 0.96 |
| 3710  | 153945846 | <b>ITPR3</b>   | <i>inositol 1,4,5-trisphosphate receptor type 3</i>          |    |   | 19  |    | 7   | 21 | 0.95 |
| 26608 | 7549793   | <b>TBL2</b>    | <i>transducin (beta)-like 2</i>                              |    |   |     |    | 2   | 2  | 0.94 |
| 79143 | 225703079 | <b>MBOAT7</b>  | <i>membrane bound O-acyltransferase domain containing 7</i>  | 24 | 2 | 106 |    | 119 | 56 | 0.92 |
| 57130 | 170016077 | <b>ATP13A1</b> | <i>ATPase 13A1</i>                                           | 11 | 6 | 28  | 21 | 32  | 25 | 0.91 |
| 1528  | 41281768  | <b>CYB5A</b>   | <i>cytochrome b5 type A</i>                                  | 4  |   | 9   | 6  | 14  | 13 | 0.91 |
